# Supplementary material for: Extra Purified Exosomes from Human Placenta Contain an Unpredictable Small Number of Different Major Proteins
Source: PubMed Central journal article supplement (PMC6566543; doi:10.3390/ijms20102434), 2019-05-16
Supplement: ijms-20-02434-s001.pdf [file ijms-20-02434-s001.pdf]

**Supplementary Table 1.** Summarized data of identification of major proteins of placenta exosomes (first peak after gel filtration) using MALDI mass spectrometry of proteins hydrolyzates after 2D-electrophoresis (Fig. 5B) and after SDS-PAGE of four different preparations (Figs 4A and 5A)

| Bands and spots used for proteins identification     | Identified proteins                  | Mr(exper.)                                                                                      | Mr(calc)                                                                                       | Score  | Unique (U)                      | Peptide subjected to MS/MS <sup>a</sup>                                                                                                                                                          |
|------------------------------------------------------|--------------------------------------|-------------------------------------------------------------------------------------------------|------------------------------------------------------------------------------------------------|--------|---------------------------------|--------------------------------------------------------------------------------------------------------------------------------------------------------------------------------------------------|
| <b>Analysis of proteins after 2D-electrophoresis</b> |                                      |                                                                                                 |                                                                                                |        |                                 |                                                                                                                                                                                                  |
| Protein spot: 1                                      | Hemoglobin alpha-subunit             | 1528.63<br>1832.74<br>2995.17                                                                   | 1528.73<br>1832.88<br>2995.48                                                                  | 174>40 | U                               | K.VGAHAGEYGAEALER.M<br>K.TYFPHFDLSHGSAQVK.G<br>K.VADALTNVAHAVDDMPNALSALSDL<br>HAHK.L                                                                                                             |
|                                                      | Hemoglobin beta-subunit              | 1125.67<br>1273.85<br>1377.82<br>1669.03                                                        | 1125.57<br>1273.72<br>1377.69<br>1668.88                                                       | 132>40 | U<br>U<br>U                     | K.LHVDPENFR.L<br>R.LLVVYPWTQR.F<br>K.EFTPPVQAAAYQK.V<br>K.VLGAFSDDLHLADNLK.                                                                                                                      |
| Protein spots: 2, 3, and 4                           | Annexin A2                           | 1034.63<br>1085.59<br>1110.67<br>1224.70<br>1243.75<br>1420.83<br>1459.83<br>1542.01<br>1908.09 | 1034.52<br>1085.67<br>1110.55<br>1224.56<br>1243.62<br>1420.69<br>1459.67<br>1541.84<br>1907.9 | 110>40 | U<br>U<br>U                     | K.WISIMTER.S<br>K.VLIRIMVSR.S<br>R.QDIAFAYQR.R<br>K.DIISDTSGDFR.K<br>R.TNQELQEINR.V<br>K.SLYYYYIQDQTK.G<br>K.SYSPYDMLESIR.K<br>K.GVDEVTVNILTNR.S<br>R.AEDGSVIDYELIDQDAR.D                        |
| Protein spots: 5, 6, and 7                           | Annexin A5                           | 953.69<br>1000.77<br>1013.67<br>1051.64<br>1105.78<br>1119.19<br>1126.89<br>1154.62<br>1801.91  | 953.53<br>1000.59<br>1013.51<br>1051.55<br>1105.58<br>1119.59<br>1126.69<br>1154.60<br>1801.86 | 121>40 | U<br>U<br>U                     | K.FITIFGTR.S<br>K.VLTEIIASR.T<br>R.LYDAYELK.H<br>K.SELTGKFEK.L + Methyl (C-term)<br>R.SEIDLFNIR.K<br>R.SEIDLFNIR.K + Methyl (C-term)<br>K.LIVALMKPSR.L<br>K.GAGTDDHTLR.V<br>K.YMTISGFGIEETIDR.E  |
| Protein spot: 8                                      | Annexin A1                           | 1261.65<br>1370.71<br>1549.87<br>1738.79                                                        | 1261.59<br>1370.76<br>1549.81<br>1738.73                                                       | 51>40  | U<br>U                          | K.TPAQFDADDEL.R.A<br>K.VLDLELKGDIK.C<br>K.GTDVNVFNILTTR.S<br>R.SEDFGVNEDLADSDAR.A                                                                                                                |
| Protein spots: 9, 10, 11, 12, 13,14, and 15          | Actin, cytoplasmic                   | 1197.89<br>1514.97<br>1790.14<br>1953.33<br>2214.39<br>2342.49<br>3183.04                       | 1197.69<br>1514.74<br>1789.88<br>1953.06<br>2214.06<br>2342.16<br>3182.61                      | 196>40 | U<br>U<br>U<br>U<br>U<br>U      | R.AVFPSIVGRPR.H<br>K.IWHHTFYNELR.V<br>K.SYELPDGQVITIGNER.F<br>R.VAPEEHPVLLTEAPLNPK.A<br>K.DLYANTVLSGGTTMYPGIADR.M<br>R.KDLYANTVLSGGTTMYPGIADR.M<br>R.TTGIVMDSGDGVHTVPIYEGYALPH<br>AILR.L         |
| Protein spots: 16, 17, and 18                        | Heavy chains of IgGs <sup>b</sup>    | 1790.00<br>1028.64<br>1773.13<br>1599.89                                                        | 1789.93<br>1028.58<br>1773.00<br>1599.77                                                       | 96>40  | U                               | K.VSVFVPPRDGFFGNPR.K<br>R.QIQVSWLR.E<br>K.GVALHRPDVYLLPPAR.E<br>K.YVTSAPMPEPQAPGR.Y                                                                                                              |
| Protein spots: 19, 20, 21, 22, and 23                | Alkaline phosphatase, placental type | 1086.63<br>1127.72<br>1304.84<br>1450.82<br>1623.97<br>1950.89<br>2368.39<br>3233.91            | 1086.49<br>1127.58<br>1304.68<br>1450.65<br>1623.78<br>1950.86<br>2368.13<br>3233.56           | 308>40 | U<br>U<br>U<br>U<br>U<br>U<br>U | R.IDHGHESR.A<br>R.GFFLFVEGGR.I<br>K.GNFQTIGLSAAAR.F<br>R.NWYSADVPASAR.Q<br>R.ALTEITIMFDDAIER.A<br>K.DGARPDVTESESGSPEYR.Q<br>R.QQSAVPLDEETHAGEDVAVFAR.G<br>R.AGQLTSEEDTSLVLTADHSHVFSFGGY<br>PLR.G |
| Protein spots: 24 and 25                             | Human serum albumin <sup>b</sup>     | 1623.05<br>1742.16<br>1853.2<br>1874.30<br>1898.29<br>2044.39<br>2202.32                        | 1622.78<br>1741.87<br>1852.9<br>1874.01<br>1897.99<br>2044.09<br>2201.99                       | 190>40 | U<br>U<br>U<br>U<br>U<br>U<br>U | K.DVFLGMFLYFYAR.R<br>R.HPYFYAPELFFAK.R<br>R.RPCFSALEVDETYVPK.E<br>K.SLHTLFGDKLCTVATLR.E<br>R.RHPYFYAPELFFAK.R<br>K.VDEFKPLVEEPQNLK.Q<br>K.EFNAETFTFHADICTLSEK.E                                  |
| Protein spots: 26 and 27                             | Serotransferrin                      | 1208.49<br>1262.58<br>1282.49<br>1477.66<br>1702.78                                             | 1208.56<br>1262.61<br>1282.56<br>1477.72<br>1702.75                                            | 200>40 |                                 | K.DSGFQMNQLR.G +Methyl(C-term)<br>K.SASDLTWDNLK.G +Methyl(C-term)<br>K.EGYGYTGAFR.C<br>K.SASDLTWDNLK.G +Methyl(C-term)<br>R.EGTCPEAPTDECKPVK.W                                                   |

| Identification of additional proteins from their analysis after 1D electrophoresis |                                      |                                                                                                                                            |                                                                                                                                            |        |        |                                                                                                                                                                                                                                             |
|------------------------------------------------------------------------------------|--------------------------------------|--------------------------------------------------------------------------------------------------------------------------------------------|--------------------------------------------------------------------------------------------------------------------------------------------|--------|--------|---------------------------------------------------------------------------------------------------------------------------------------------------------------------------------------------------------------------------------------------|
| Exo-1, spot 2, Fig. 4                                                              | Light chain of ferritin <sup>b</sup> | 1192.44<br>1490.58<br>1590.73<br>1606.65<br>1718.90                                                                                        | 1192.57<br>1490.71<br>1590.88<br>1606.79<br>1718.98                                                                                        | 80>40  |        | K.MGDHLTNLHR.L<br>R.DDVALEGVSHFFR.E<br>K.LNQALLDLHALGSAR.T<br>R.LGGPEAGLGEYLFER.L<br>K.KLNQALLDLHALGSAR.T                                                                                                                                   |
|                                                                                    | Heavy chain of ferritin <sup>b</sup> | 1152.76<br>1344.84<br>1544.94<br>3278.51                                                                                                   | 1152.59<br>1344.62<br>1544.70<br>3278.58                                                                                                   | 75>40  |        | K.ELGDHVTNLR.K<br>K.YFLHQSHEER.E<br>R.QNYHQDSEAAINR.Q<br>R.QINLELYASYVYLSMSYYFDRDDVAL<br>K.N                                                                                                                                                |
| Exo-1, spot 3, Fig. 4 and spot 3, Fig. 5                                           | CD63                                 | 693.27<br>1100.41<br>1231.40<br>1983.79                                                                                                    | 693.28<br>1100.46<br>1231.43<br>1983.83                                                                                                    | 79>40  | U<br>U | MAVEGGM.K<br>K.VMSEFNNNF.R<br>K.CCGAANYTDWE.K<br>R.VPDSCCIDVTVGCGINFNE.K                                                                                                                                                                    |
| Exo-1, spot 4, Fig.4 and spot 3, Fig. 5                                            | CD81                                 | 445.28<br>630.29<br>695.30<br>2252.03                                                                                                      | 445.22<br>630.21<br>695.26<br>2252.03                                                                                                      | 80>40  | U<br>U | K.DQIA.K<br>K.EDCHQ.K<br>MGVEGCT.K<br>K.QFYDQALQQAVVDDANNA.K                                                                                                                                                                                |
| Exo-1, spot 7, Fig. 4 and spot 10, Fig. 5                                          | Alpha actin 4                        | 949.51<br>1010.58<br>1028.63<br>1091.67<br>1214.76<br>1225.76<br>1298.78<br>1300.72<br>1351.75<br>1420.83<br>1428.89<br>1506.84<br>1624.88 | 949.43<br>1010.49<br>1028.53<br>1091.56<br>1214.67<br>1225.66<br>1298.66<br>1300.60<br>1351.62<br>1420.70<br>1428.76<br>1506.70<br>1624.72 | 121>40 |        | R.QGAEFNR.I<br>K.QQSNEHLR.R<br>R.TIPWLEDR.V<br>K.NFITAEELR.R<br>K.LASDLLEWIR.R<br>K.DGLAFNALIHR.H<br>R.HRPELIEYDK.L<br>K.HTNYTMEHIR.V<br>K.GISQEQMQEFR.A K.<br>GYEEWLLNEIR.R<br>R.TINEVENQILTR.D<br>K.AGTQIENIDEDFR.D<br>K.HEAFESDLAAHQDR.V |

<sup>a</sup>MS - determination of a set of peptides from tryptic hydrolysates, MS/MS in accordance with the sequences of peptides (from three to thirteen peptides).

<sup>b</sup>IgGs, HSA and ferritin, unlike other proteins, are not the internal proteins of the exosomes.
